# Ocular toxicities associated with targeted anticancer agents: an analysis of clinical data with management suggestions

This article has been corrected. Correction in: [Oncotarget. 2019; 10:1011-1013.](#)

Chen Fu<sup>1</sup>, Dan S. Gombos<sup>5</sup>, Jared Lee<sup>2</sup>, Goldy C. George<sup>3</sup>, Kenneth Hess<sup>4</sup>, Andrew Whyte<sup>5</sup> and David S. Hong<sup>3</sup>

<sup>1</sup>Department of Internal Medicine, New York University Langone Medical Center, NY 10016, USA

<sup>2</sup>Department of Internal Medicine, Baylor College of Medicine, TX 77030, USA

<sup>3</sup>Department of Phase I Clinical Trials, The University of Texas MD Anderson Cancer Center, TX 77030, USA

<sup>4</sup>Department of Biostatistics, The University of Texas MD Anderson Cancer Center, TX 77030, USA

<sup>5</sup>Department of Head and Neck Surgery, Division of Ophthalmology, The University of Texas MD Anderson Cancer Center, TX 77030, USA

**Correspondence to:** David S. Hong, **email:** dshong@mdanderson.org

**Keywords:** targeted, cancer, ocular, toxicity, management

**Received:** September 20, 2016

**Accepted:** March 16, 2017

**Published:** May 05, 2017

**Copyright:** Fu et al. This is an open-access article distributed under the terms of the Creative Commons Attribution License 3.0 (CC BY 3.0), which permits unrestricted use, distribution, and reproduction in any medium, provided the original author and source are credited.

## ABSTRACT

Ocular toxicities are among the most common adverse events resulting from targeted anticancer agents and are becoming increasingly relevant in the management of patients on these agents. The purpose of this study is to provide a framework for management of these challenging toxicities based on objective data from FDA labels and from analysis of the literature. All oncologic drugs approved by the FDA up to March 14, 2015, were screened for inclusion. A total of 16 drugs (12 small-molecule drugs and 4 monoclonal antibodies) were analyzed for ocular toxicity profiles based on evidence of ocular toxicity. Trials cited by FDA labels were retrieved, and a combination search in Medline, Google Scholar, the Cochrane database, and the NIH Clinical Trials Database was conducted. The majority of ocular toxicities reported were low severity, and the most common were conjunctivitis and "visual disturbances." However, severe events including incidents of blindness, retinal vascular occlusion, and corneal ulceration occurred. The frequency and severity at which ocular toxicities occur merits a more multidisciplinary approach to managing patients with agents that are known to cause ocular issues. We suggest a standardized methodology for referral and surveillance of patients who are potentially at risk of severe ocular toxicity.

## INTRODUCTION

Targeted chemotherapy agents are becoming increasingly important in the clinical management of cancer. Of 42 novel oncologic drugs approved since 2008, 30 were either antibodies or kinase inhibitors targeting specific receptors or unique intracellular signal transduction pathways [1]. This number of approved oncologic drugs is significantly higher than the 15 agents approved between 2000 and 2008. Whereas the toxicity profiles of traditional oncologic agents are known and relatively well-described, the toxicity profiles of targeted therapy agents are not as well-known and include adverse

sight-threatening events [2-4]. Ocular toxicities are among the most common adverse events associated with targeted agents [2-7]. This high frequency of ocular adverse events can be partially attributed to the delicate homeostatic environment of growth factors, cell receptors, and vascular formation in the eye, a unique microenvironment that is disrupted by many targeted agents [4,8-13]. Currently, there is a paucity of data documenting particular ocular toxicities of targeted agents [2,4,6]. The purpose of this study is to provide a better understanding of the toxicities that have been observed in various targeted therapies and to provide recommendations for screening, surveillance, and management of these events.

## RESULTS

### Drug selection and FDA label review

Of the 138 agents that were screened for inclusion in the study, 34 were palliative or non-anticancer agents, 12 were duplicates that were approved for separate indications, and 46 were cytotoxic, non-targeted, or conjugated agents and were therefore excluded; the remaining 46 agents were reviewed and screened for their association with ocular toxicities, as described in the Methods section.

FDA labels were reviewed for mention of ocular toxicities, from which 20 agents were associated with some form of ocular toxicity. Three agents (bortezomib, pertuzumab, and dabrafenib) were associated with minor ocular adverse events according to the FDA label, but limited evidence of ocular toxicity was evident upon an independent survey of the literature. Multiple rigorous case reports have associated bortezomib with eyelid chalazia [14-16] and dabrafenib with uveitis and cystoid macula edema [17], however, due to lack of quantified trial data, these agents were excluded from Table 2. Similarly, two agents (idelalisib and ibrutinib) were found to have adverse events from our literature review, but the FDA labels included no mention of ocular toxicity; these agents were excluded from Table 1 but were included in subsequent analysis. A total of 16 agents, including 12 small-molecule drugs and 4 monoclonal antibodies, were analyzed in this study for ocular toxicity profiles based on evidence from FDA labels and clinical trials. Therefore, of the original 46 targeted medications, 18 of 30 small-molecule drugs (60%) and 12 of 16 monoclonal antibodies (75%) were not associated with ocular toxicity and were thus excluded. A summary of ocular toxicities from the FDA label review is included in Table 1.

### Ocular adverse events

We conducted a review of 217 independent studies, 32 of which met inclusion criteria. The results and ocular adverse events described in these studies are included in Table 2.

Ocular events were scored according to severity and CTCAE grade, as detailed in Table 3. Severe ocular adverse events that were not given a grade were also reported. The most common severe adverse event included severe conjunctivitis, associated with 9 (19.6%) of the total targeted agents, and blurred vision, connected with 10 agents (21.7%). Imatinib had the highest incidence of grade 3 or higher events among all targeted agents, with 3% of patients experiencing grade

3 or higher periorbital edema. Imatinib and crizotinib had the highest incidence of ocular toxicity overall, with 70% and 62-64% of patients experiencing some form of ocular toxicity per FDA statistics and an independent review of available data (Tables 1 and 2). Acute vision-threatening events (including retinal vascular occlusion, retinal pigment epithelial detachment, corneal membrane ulceration and perforation, and blindness) were rare, almost always occurring <1% of the time in their respective drug classes. Only 5 drugs (10.9%) were associated with these vision-threatening events, namely erlotinib, gefitinib, trametinib, vemurafenib, and ipilimumab.

The most severe ocular adverse events occurred with EGFR, MEK and CTLA-4 inhibitors and targeted antibodies. These events included corneal perforation and retinal vascular occlusion. Retinal vascular occlusion had an incidence of 0.8%. Corneal perforation was described primarily in case reports and case studies; however, 3 patients in a large phase 1 trial of gefitinib with a cohort of 221 patients experience grades 1-3 corneal erosion and corneal defects. Use of ipilimumab resulted in the most severe adverse event, causing blindness in 2 out of 393 patients [18].

Small-molecule drugs appear to have a higher incidence of ocular toxicity than do monoclonal antibodies. The percentage of small-molecule drugs associated with ocular toxicity (37.5%) was higher than that associated with monoclonal antibodies (28.6%). Even within the same class of action, monoclonal antibodies resulted in fewer adverse events than did their small-molecule counterparts.

### Summary and management recommendations

A summary of ocular events and management recommendations are presented in Table 4. While there is a paucity of data on this subject, our recommendations are based on available data from clinical trials, case reports and series, clinical experience, expert opinion, and existing national guidelines. One of the central underlying themes in the management recommendations is the concept of establishing a pretreatment baseline to better gauge subsequent ocular adverse events. Screening suggestions were modeled after preferred practice patterns on the management of ocular toxicities of hydroxychloroquine, issued by the American Academy of Ophthalmology, [19] and of ethambutol, issued by the Hong Kong Ophthalmologic Society [20]. Guidelines were referenced according to frequency of screening in drugs that showed a similar incidence and severity of ocular toxicities. From this, specific screening parameters were formulated based on severity of adverse

**Table 1: FDA label notes regarding ocular adverse events**

| Therapy                            | FDA Label Notes                                                                                                                                                                                                                                                                                                                                                                                                                                  |
|------------------------------------|--------------------------------------------------------------------------------------------------------------------------------------------------------------------------------------------------------------------------------------------------------------------------------------------------------------------------------------------------------------------------------------------------------------------------------------------------|
| Small-Molecule Targeted Inhibitors |                                                                                                                                                                                                                                                                                                                                                                                                                                                  |
| Afatinib (Gilotrif) [30]           | Conjunctivitis 11% n=229<br>Keratitis 0.8% n=3865 patients with 1 grade III event.                                                                                                                                                                                                                                                                                                                                                               |
| Bortezomib (Velcade) [31]          | Label mentions diplopia, blurred vision, conjunctival infection, irritation. Case reports associated with eyelid chalazia.                                                                                                                                                                                                                                                                                                                       |
| Ceritinib (Zykadia) [32]           | Vision disorder 9% (comprised of vision impairment, blurred vision, photopsia, accommodation disorder, presbyopia, or reduced visual acuity) n=255                                                                                                                                                                                                                                                                                               |
| Crizotinib (Xalkori) [33]          | Vision disorder 64% (Includes diplopia, photopsia, photophobia, vision blurred, visual field defect, visual impairment, vitreous floaters, visual brightness, and visual acuity reduced.) n=255                                                                                                                                                                                                                                                  |
| Dabrafenib (Tafinlar) [34]         | Uveitis/Iritis 1% n=586. Can cause cystoid macula edema.                                                                                                                                                                                                                                                                                                                                                                                         |
| Dasatinib (Sprycel) [35]           | Visual disorder (visual disturbance, vision blurred, decreased visual acuity) or dry eye in 1-10% Conjunctivitis in 0.1-1%                                                                                                                                                                                                                                                                                                                       |
| Erlotinib (Tarceva) [36]           | Reported Conjunctivitis in 18% n=84,<br>Conjunctivitis 12% (with 1 Grade III) n=485 and Keratoconjunctivitis Sicca 12% n=485.<br>Mentions of corneal perforation or ulceration, and abnormal eyelash growth.<br>The pooled incidence of ocular disorders was 17.8% in three lung cancer studies and 12.8% in one pancreatic cancer study.                                                                                                        |
| Gefitinib (Iressa) [37]            | Mentions of eye irritation, eye pain, corneal erosion/ulcer, aberrant eyelash growth, corneal membrane sloughing, and ocular ischemia/hemorrhage.                                                                                                                                                                                                                                                                                                |
| Imatinib (Gleevec) [38]            | Estimated 1%-10%: conjunctivitis, vision blurred, eyelid edema, conjunctival hemorrhage, dry eye<br>Estimated 0.1%-1%: eye irritation, eye pain, orbital edema, scleral hemorrhage, retinal hemorrhage, blepharitis, macular edema.<br>Estimated 0.01%-0.1%: papilledema, glaucoma, cataract.<br>Among FDA cited studies (n=729), incidence of periorbital edema was 57.8%, hyperlacrimation 14.1%, and visual disturbance 7.1%.                 |
| Nilotinib (Tasigna) [39]           | Common: eye hemorrhage, periorbital edema, eye pruritus, conjunctivitis, dry eye.<br>Uncommon: vision impairment, vision blurred, visual acuity reduced, photopsia, eye irritation.<br>Unknown frequency: papilloedema, diplopia, photophobia, eye swelling, blepharitis, eye pain, chorioretinopathy, conjunctival hemorrhage, conjunctivitis allergic, conjunctival hyperaemia, ocular hyperaemia, ocular surface disease, scleral hyperaemia. |
| Trametinib (Mekinist) [40]         | Mentions blurry vision, dry eye, transient blindness, eye floaters, and visual halo.<br>Incidence of Retinal Vein Occlusion was 0.2% (4/1,749).<br>Incidence of Retinal Pigment Epithelial Detachment was 0.8% (14/1,749).                                                                                                                                                                                                                       |
| Vandetanib (Caprelsa) [41]         | Blurry vision (corneal opacities) 9%. No cohort information.                                                                                                                                                                                                                                                                                                                                                                                     |
| Vemurafenib (Zelboraf) [42]        | Mentions retinal vein occlusion, uveitis, blurry vision, iritis, and photophobia                                                                                                                                                                                                                                                                                                                                                                 |

*(Continued)*

| Therapy                            | FDA Label Notes                                                                                                                      |
|------------------------------------|--------------------------------------------------------------------------------------------------------------------------------------|
| Monoclonal Antibodies              |                                                                                                                                      |
| Cetuximab (Erbix) [43]             | Label mentions existence of blepharitis, conjunctivitis, keratitis/ulcerative keratitis with decreased visual acuity, and cheilitis. |
| Ipilimumab (Vervoy) [44]           | Label mentions existence of uveitis, iritis, episcleritis, conjunctivitis, and blepharitis.                                          |
| Panitumumab (Vectibix) [45]        | Eye/eyelid irritation (1%), conjunctivitis (4%), ocular hyperemia (3%), increased lacrimation (2%), in 463 patients                  |
| Pertuzumab (Perjeta) [46]          | Mentions increased lacrimation (No evidence of this in literature)                                                                   |
| Rituximab (Rituxan, Mabthera) [47] | Mentions uveitis and optic neuritis                                                                                                  |

events and on drug mechanism. For instance, screening suggestions for MEK inhibitors focused on assessing retinal integrity due to MEK inhibition's potent effect on retinal maintenance and repair, as evidenced by its severe adverse event profile.

## DISCUSSION

Ocular toxicities are becoming increasingly relevant with the increased use of targeted agents. Sparse data exist with regard to specific recommendations for the screening and management of these toxicities. The goal of this study was to review data from FDA labels and from independent studies to determine which agents need ophthalmologic management and to provide recommendations for the screening and management of patients receiving these agents. Management recommendations have already been explored by various groups. The FDA labels include detailed recommendations for at least two agents, namely trametinib and ipilimumab. These recommendations are incorporated into this study. Van der Noll et al. presented a review of ocular toxicity with management recommendations and algorithms for serous retinal detachment and retinal venous occlusion in 2013 [21]. Our study provides a comprehensive and agent-specific set of recommendations for the management and screening of known ocular toxicities.

Our data analysis showed that for the majority of agents, the most common types of ocular toxicity were low-grade in severity, primarily grade 1 or 2 according to the CTCAE [22]. Table 5 provides a detailed list of adverse events and the agents that cause them. The most common complications among all agents (both small-molecules agents and monoclonal antibodies) were conjunctivitis and "visual disturbances." However, the progression of even the most common toxicities was not consistent, and some toxicities were severe, as evidenced by at least two case reports in which rapid progression to blindness occurred with use of ipilimumab and crizotinib [18,23]. As such, the

establishment of a visual baseline is important to assess the severity and progression of signs and symptoms that may arise throughout the course of management. We believe that the incidence of ocular toxicities in certain agents and the potential for severity is enough to merit ophthalmic referral when prescribing these agents. The most important suggestion based on these data is the establishment of an ophthalmic baseline for targeted anticancer drugs known to cause ocular toxicities.

Unlike their cytotoxic counterparts, targeted inhibitors tend to be highly specific for their molecular targets (more than 99% in most cases). As such, toxicities tend to be much more focal than systemic. Examples of this phenomenon can be seen in these data, in particular among the most severe adverse events, such as corneal ulceration, blindness, or retinal artery or vein occlusion (Figure 1), which were associated with a minority of agents. EGFR inhibitors and MEK inhibitors as a class were associated with a high proportion of severe ocular toxicities. It is known that EGFR is intimately involved in angiogenesis and wound healing [4,24]; as such, it is not surprising that the most severe ocular toxicities associated with this class of agent included complications with delayed wound healing, such as corneal ulceration. Corneal microcysts (Figure 2) have also been seen in some patients undergoing EGFR inhibitor therapy in Phase I trials. MEK inhibitors inhibit a key step in the MAPK signal transduction pathway, and an increasing body of evidence suggests that this pathway is involved in the maintenance and repair of the retina [4,12,13]. Trametinib, a MEK 1/2 inhibitor, is known to increase the risk of severe retinal issues (Figure 3), such as retinal detachment and retinal vascular occlusion.

Given the high degree of specificity that targeted agents exhibit, clinicians are better able to direct their screening of toxicity toward these specific regions of the eye that certain agents are known to affect. As such, mechanism-based screening guidelines may be appropriate for screening toxicity in targeted agents. An example taken from our management suggestions

**Table 2: Ocular adverse events from studies**

| Therapy                                    | Total<br>OAEs | Cohort<br>Size | Ocular Adverse<br>Events |                            |                               |
|--------------------------------------------|---------------|----------------|--------------------------|----------------------------|-------------------------------|
|                                            |               |                | Most Common              | Second Most<br>Common      | Other                         |
| Small Molecules                            |               |                |                          |                            |                               |
| Afatinib (Gilotrif) [48-50]                | 19            | 123            | Conjunctivitis (NA)      | NA                         | NA                            |
| Ceritinib (Zykadia) [51-53]                | 12            | 130            | Visual Disturbance (12)  | NA                         | NA                            |
| Crizotinib (Xalkori) [54,55]               | 199           | 322            | Visual Disturbance (199) | NA                         | NA                            |
| Dasatinib (Sprycel) [56,57]                | 6             | 84             | Periorbital Edema (6)    | NA                         | NA                            |
| <sup>a</sup> Erlotinib (Tarceva) [58-62]   | 28            | 485            | NA                       | NA                         | NA                            |
| Gefitinib (Iressa) [63-66]                 | 170           | 648            | Conjunctivitis (67)      | Dry Eyes (35)              | Visual<br>Disturbance<br>(29) |
| Ibrutinib (Imbruvica) [67]                 | NA            | 195            | Visual Disturbance (19)  | Cataract (6)               | NA                            |
| Imatinib (Gleevec) [68-71]                 | 175           | 250            | Periorbital Edema (175)  | Hyperlacrimation<br>(45)   | NA                            |
| <sup>b</sup> Nilotinib (Tasigna) [71]      | NA            | 556            | Periorbital Edema (3)    | NA                         | NA                            |
| <sup>a</sup> Trametinib (Mekinist) [72-75] | 70            | 613            | NA                       | NA                         | NA                            |
| Vandetanib (Caprelsa) [76]                 | 21            | 231            | Visual Disturbance (21)  | NA                         | NA                            |
| Vemurafenib (Zelboraf) [77,78]             | 497           | 3559           | Conjunctivitis (131)     | Visual Disturbance<br>(82) | Dry Eyes (51)                 |
| Total Small Molecules                      | 1197<br>(19%) | 6445           |                          |                            |                               |
| Monoclonal Antibodies                      |               |                |                          |                            |                               |
| Cetuximab (Erbix) [50]                     | 6             | 60             | Conjunctivitis (5)       | NA                         | NA                            |
| Ipilimumab (Vervoy) [18]                   | 37            | 393            | NA                       | NA                         | NA                            |
| Panitimumab (Vectibix) [79]                | 61            | 375            | NA                       | NA                         | NA                            |
| Rituximab (Rituxan, Mabthera) [76,80]      | 10            | 132            | Conjunctivitis (4)       | Visual Disturbance<br>(3)  | Periorbital<br>Edema (2)      |
| Total Monoclonal Antibodies                | 114<br>(12%)  | 960            |                          |                            |                               |

NA: studies did not report this finding; OAE: ocular adverse event.

<sup>a</sup>Studies did not report individual ocular adverse events.

<sup>b</sup>Studies did not report total ocular adverse events.

is the targeted surveillance of the retina in patients undergoing MEK inhibitor therapy. For drugs with known retinal toxicities such as trametinib, we suggest self-screening by the patient with an Amsler grid for visual field monitoring. Identification of any of these ocular symptoms merits urgent referral for additional ophthalmologic assessment. For agents known to be

associated with more severe ocular toxicities (e.g., gefitinib, trametinib, vemurafenib, and ipilimumab), we suggest routine ophthalmic surveillance and baseline assessment by an ophthalmologist. A review of symptoms such as eye pain, redness, and changes in vision should be obtained by the medical oncologist at each follow-up visit.



**Table 3: Severe ocular adverse events (% total patients)**

| Therapy                           | Grade I                                                                                                                                    | Grade II                                                                                          | Grade III                                                                               | Grade IV                                                                                                            | Other Serious OAEs                                                                                |
|-----------------------------------|--------------------------------------------------------------------------------------------------------------------------------------------|---------------------------------------------------------------------------------------------------|-----------------------------------------------------------------------------------------|---------------------------------------------------------------------------------------------------------------------|---------------------------------------------------------------------------------------------------|
| Small Molecules                   |                                                                                                                                            |                                                                                                   |                                                                                         |                                                                                                                     |                                                                                                   |
| Afatinib (Gilotrif) [30,48-50]    | Keratitis (0.8%), Conjunctivitis (11%)                                                                                                     |                                                                                                   | Keratitis (0.4%)                                                                        |                                                                                                                     |                                                                                                   |
| Ceritinib (Zykadia) [32,53]       | Vision Disorder (9%) <sup>a</sup>                                                                                                          |                                                                                                   |                                                                                         |                                                                                                                     |                                                                                                   |
| Crizotinib (Xalkori) [33,54,55]   | Vision Disorder (64%) <sup>b</sup>                                                                                                         |                                                                                                   |                                                                                         |                                                                                                                     |                                                                                                   |
| Dasatinib (Sprycel) [35,56,57]    | Vision Disorder (7%), Conjunctivitis (<1%)                                                                                                 |                                                                                                   |                                                                                         |                                                                                                                     |                                                                                                   |
| Erlotinib (Tarceva) [36,58-62]    | Conjunctivitis (5.3%), Keratoconjunctivitis Sicca (2.5%)                                                                                   |                                                                                                   | Conjunctivitis (<1%)                                                                    |                                                                                                                     | Corneal Perforation or Ulceration                                                                 |
| Gefitinib (Iressa) [37,63-66]     | Conjunctivitis (7%), Dry Eyes (8%), Corneal Erosion (0.5%), Visual Disturbance (4%) <sup>c</sup> , Superficial Punctate Keratopathy (0.2%) | Dry Eye (<1%), Conjunctivitis (1%), Corneal Erosion (<1%), Superficial Punctate Keratopathy (<1%) | Corneal Erosion (<1%)                                                                   |                                                                                                                     | Corneal Ulcer, Corneal Membrane Sloughing, Ocular Ischemia and Hemorrhage                         |
| Ibrutinib (Imbruvica) [67,81]     | Visual disturbance (10%), Cataract (3%)                                                                                                    |                                                                                                   |                                                                                         |                                                                                                                     |                                                                                                   |
| Imatinib (Gleevec) [38,68-71]     | Periorbital edema (57.8%)                                                                                                                  | Periorbital edema (21.2%)                                                                         |                                                                                         |                                                                                                                     |                                                                                                   |
|                                   | Conjunctivitis (13%),                                                                                                                      |                                                                                                   | Periorbital Edema (3%), Visual Disturbance (0.8%)                                       |                                                                                                                     |                                                                                                   |
| Nilotinib (Tasigna) [39,71]       | Periorbital Edema (1%)                                                                                                                     |                                                                                                   | Periorbital Edema (0.2%)                                                                |                                                                                                                     | Eye Hemorrhage, Visual Impairment                                                                 |
| Trametinib (Mekinist) [40,72-75]  | Dry eye (2%), Blurred vision (2%)                                                                                                          |                                                                                                   | Central Serous Choroid-retinopathy Figure 2 (0.5%)                                      |                                                                                                                     | Retinal Veinous Occlusion Figure 4 (0.2%), Retinal Pigment Epithelial Detachment (0.8%)           |
| Vandetanib (Caprelsa) [41,76]     | Corneal Opacities (9%)                                                                                                                     |                                                                                                   |                                                                                         |                                                                                                                     |                                                                                                   |
| Vemurafenib (Zelboraf) [42,77,78] | Blurred Vision (2.4%) <sup>d</sup> , Conjunctivitis (4%), Eye Pain (0.9%), Uveitis (1.3%)                                                  |                                                                                                   | Uveitis (0.2%), Cataracts (0.1%), Iridocyclitis (0.1%), Reduced visual activity (<0.1%) | Uveitis (<0.1%), Amaurosis (<0.1%), Macular Edema (<0.1%), Retinal Artery Occlusion (<0.1%), Conjunctivitis (<0.1%) | Macular Degeneration, Blepharitis, Glaucoma, Papilledema, Retinal Detachment, Vitreous Hemorrhage |

*(Continued)*

| Therapy                                     | Grade I                                                                 | Grade II | Grade III                        | Grade IV        | Other Serious OAEs                                                 |
|---------------------------------------------|-------------------------------------------------------------------------|----------|----------------------------------|-----------------|--------------------------------------------------------------------|
| Monoclonal Antibodies                       |                                                                         |          |                                  |                 |                                                                    |
| Cetuximab (Erbix)<br>[43,50]                | Conjunctivitis (1-10%)                                                  |          | Conjunctivitis (<1%)             |                 |                                                                    |
| Ipilimumab (Vervoy)<br>[18,44]              |                                                                         |          | Cataract (<1%),<br>Uveitis (<1%) | Blindness (<1%) | Uveitis, Iritis,<br>Episcleritis,<br>Graves-like<br>Ophthalmopathy |
| Panitimumab<br>(Vectibix) [45,79]           | Conjunctivitis (6%), Ocular<br>Hyperemia (3%), Hyperlacrimation<br>(2%) |          |                                  |                 |                                                                    |
| Rituximab (Rituxan,<br>Mabthera) [47,76,80] | Conjunctivitis (3%), Visual<br>Disturbance (2%), Eye Pain (1%)          |          | Glaucoma (<1%)                   |                 |                                                                    |

OAE: ocular adverse event.

<sup>a</sup>Comprises vision impairment, blurred vision, photopsia, accommodation disorder, presbyopia, or reduced visual acuity.

<sup>b</sup>Includes diplopia, photopsia, photophobia, vision blurred, visual field defect, visual impairment, vitreous floaters, visual brightness, and reduced visual acuity.

<sup>c</sup>Includes blurred vision, bilateral hemianopia, and photophobia.

<sup>d</sup>Of the total visual disturbances (78/3222), 41 were blurred vision, 22 vision impairment, 12 reduced visual acuity, 2 transient blindness, 1 blindness.

Many of the ocular toxicities displayed by targeted agents are closely related to the drug's mechanism of action, a sentiment commonly echoed in relevant scientific literature [2-6]. However, even among drugs that target the same molecule with high specificity, variations in toxicity exist. Of note, the use of monoclonal antibodies did not typically lead to as many ocular adverse events as small-molecule agents did, even among those that shared the same mechanism of action (e.g., gefitinib and cetuximab). Ocular toxicities among monoclonal antibodies seemed to be lower in both incidence and frequency. A possible reason for this is that monoclonal antibodies are less able to permeate physiological barriers [25,26], such as the blood-brain or blood-ocular barriers, and are therefore less able to interfere directly with the delicate ocular microenvironment. The exception to this, however, is ipilimumab. Although it is believed that the antibody itself is unable to cross the blood-brain barrier, evidence suggests that activated T cells may be able to penetrate the brain [27-29]. This provides one possible explanation for why ipilimumab, among all of the monoclonal antibodies, is associated with the most severe ocular adverse events.

We attempted to conduct a comprehensive meta-analysis of targeted agents in the current literature;

however, several limitations need to be acknowledged. The only agents that were included were those that were FDA-approved, so many experimental drugs were not included in this study. Most of these experimental drugs did not have sufficient study data and as such, an analysis was not feasible. A quantitative analysis was not possible due to insufficient data reported in the literature, with many agents and labels having few studies that report ocular toxicities.

Common to all retrospective analyses, variation in study quality was a limitation. Studies displayed variability and inconsistency in the reporting of ocular toxicities and ocular adverse events and in the methods of determining whether an ocular event could be attributed to the agent in question. However, the focus of the analysis was centered around phase 3 and above clinical trials validated by the FDA for quality; in this way, variability was attenuated as much as possible. Although these clinical recommendations were based on our best assessment, we recognize that many of these patients will not be receiving targeted therapy for a prolonged period and that accordingly, many of our screening recommendations may not apply in this therapeutic setting.

The CTCAE grading scale may be limited in its applications to ocular toxicity. For instance, the definition of a grade 4 adverse event, according to the CTCAE, is an

**Table 4: Common and serious ocular adverse events with management recommendations**

| Therapy                                                     | Common Adverse Events                                           | Serious Adverse Events                                                                             | Management Recommendations (From DSG)                                                                                                                                                                                                                                                                                                                                                                                                                                                                                                                                                                                                                                                                                                                                                                                                                                                                                    |
|-------------------------------------------------------------|-----------------------------------------------------------------|----------------------------------------------------------------------------------------------------|--------------------------------------------------------------------------------------------------------------------------------------------------------------------------------------------------------------------------------------------------------------------------------------------------------------------------------------------------------------------------------------------------------------------------------------------------------------------------------------------------------------------------------------------------------------------------------------------------------------------------------------------------------------------------------------------------------------------------------------------------------------------------------------------------------------------------------------------------------------------------------------------------------------------------|
| Small Molecules                                             |                                                                 |                                                                                                    |                                                                                                                                                                                                                                                                                                                                                                                                                                                                                                                                                                                                                                                                                                                                                                                                                                                                                                                          |
| EGFR Inhibitors (gefitinib, erlotinib, afatinib)            | Conjunctivitis, Blepharitis, Trichomegaly                       | Corneal Ulceration or Perforation, Ocular Ischemia                                                 | Screening: Recommend pre-treatment ophthalmic exam including slit lamp exam and dilated fundoscopic exam. Annual screening may be conducted for asymptomatic corneal signs including redness or pain. Reassess contact lens-wear. Management: Cases of Conjunctivitis have primarily been grade 2 or lower, with one grade 3 event. Withhold drug for up to 14 days with evidence of corneal abnormalities.                                                                                                                                                                                                                                                                                                                                                                                                                                                                                                              |
| Mixed VEGFR/EGFR Inhibitors (vandetanib)                    | Corneal Opacities                                               | NA                                                                                                 | Screening: Recommend pre-treatment ophthalmic exam including slit lamp exam and dilated fundoscopic exam. Management: Refer at baseline prior to initiation of medication to assess for any underlying corneal pathology. Stop medication and refer to ophthalmologist immediately if patient develops any ocular symptoms. Topical steroids may be necessary but should only be administered by an ophthalmologist                                                                                                                                                                                                                                                                                                                                                                                                                                                                                                      |
| Tyrosine Kinase Inhibitors (imatinib, nilotinib, dasatinib) | Periorbital Edema, Hyperlacrimation, Subconjunctival Hemorrhage | NA                                                                                                 | Screening: Recommend pre-treatment ophthalmic exam including slit lamp exam and dilated fundoscopic exam. Management: Periorbital edema continues to be a common event with tyrosine kinase inhibitors, namely with imatinib. In severe cases, surgical debulking has improved symptoms considerably. Consider ophthalmology referral for severe cases of periorbital edema                                                                                                                                                                                                                                                                                                                                                                                                                                                                                                                                              |
| MEK Inhibitors (trametinib)                                 | Visual Disturbances Including Transient Blindness               | Retinal Vein Occlusion, Central Serious Chorioretinopathy or Retinal Pigment Epithelial Detachment | Screening: Recommend pre-treatment ophthalmic exam including slit lamp exam and dilated fundoscopic exam. Patient screening for risk factors attributed to the development of severe events (e.g., hypertension, CAD, baseline visual deficits) should be considered before administration of MEK inhibitors. Baseline OCT, fundus photography, and Amsler grid may be performed to identify macular problems. Eye exams may be conducted every 3-6 months to monitor for severe OAEs. Management: The drug should be discontinued with signs of any serious ocular events and an ophthalmologist should be consulted. FDA label recommends holding drug for up to 3 weeks with signs of grade 2-3 retinal pigment epithelial detachment. Do not modify dabrafenib if used in combination. It is commonly believed that subretinal fluid associated with MEK inhibitors will resolve even with continuation of the drug. |

*(Continued)*



| Therapy                                          | Common Adverse Events                                  | Serious Adverse Events                       | Management Recommendations (From DSG)                                                                                                                                                                                                                                                                                                                                                                                                                                                                                                                                                                                                                                                                                                                                                                                                                                                                                                                                                  |
|--------------------------------------------------|--------------------------------------------------------|----------------------------------------------|----------------------------------------------------------------------------------------------------------------------------------------------------------------------------------------------------------------------------------------------------------------------------------------------------------------------------------------------------------------------------------------------------------------------------------------------------------------------------------------------------------------------------------------------------------------------------------------------------------------------------------------------------------------------------------------------------------------------------------------------------------------------------------------------------------------------------------------------------------------------------------------------------------------------------------------------------------------------------------------|
| ALK Inhibitors<br>(ceritinib, crizotinib)        | Visual Disturbances<br>(Photopsia and Trailing Lights) | NA                                           | Screening: Recommend pretreatment ophthalmic exam including slit lamp exam and dilated fundoscopic exam.                                                                                                                                                                                                                                                                                                                                                                                                                                                                                                                                                                                                                                                                                                                                                                                                                                                                               |
| BTK Inhibitors<br>(ibrutinib)                    | Visual Disturbances                                    | NA                                           | Screening: Recommend pre-treatment ophthalmic exam including slit lamp exam and dilated fundoscopic exam.                                                                                                                                                                                                                                                                                                                                                                                                                                                                                                                                                                                                                                                                                                                                                                                                                                                                              |
| V600E Mutated BRAF Inhibitors<br>(vemurafenib)   | Conjunctivitis, Cystoid Macular Edema                  | Uveitis, Amaurosis, Retinal Artery Occlusion | Screening: Recommend pre-treatment ophthalmic exam including slit lamp exam and dilated fundoscopic exam. Patient screening for risk factors attributed to the development of severe events (e.g., hypertension, CAD, baseline visual deficits) should be considered before administration of vemurafenib, especially in conjunction with MEK inhibitors. Eye exams may be conducted every 3-6 months to monitor for more severe ocular adverse events. Management: The drug should be discontinued with signs of any serious ocular adverse events and an ophthalmologist should be consulted.                                                                                                                                                                                                                                                                                                                                                                                        |
| Monoclonal Antibodies                            |                                                        |                                              |                                                                                                                                                                                                                                                                                                                                                                                                                                                                                                                                                                                                                                                                                                                                                                                                                                                                                                                                                                                        |
| Anti-EGFR Antibodies<br>(cetuximab, panitumumab) | Conjunctivitis                                         | NA                                           | Screening: Recommend pre-treatment ophthalmic exam including slit lamp exam and dilated fundoscopic exam.                                                                                                                                                                                                                                                                                                                                                                                                                                                                                                                                                                                                                                                                                                                                                                                                                                                                              |
| Anti-CTLA4 Antibodies<br>(ipilimumab)            | NA                                                     | Episcleritis, Blindness                      | Screening: Recommend pre-treatment ophthalmic exam including slit lamp exam and dilated fundoscopic exam. Screen for history of risk factors including history of ocular inflammatory disease and temporal arteritis. Management: Known cases of blindness occurred secondary to Posterior Reversible Encephalopathy Syndrome and were reversed with treatment of PRES. As such risk factors for the development of blindness or PRES should be considered before administration of the drug. FDA Label states: Permanently discontinue YERVOY for clinically significant or severe immune-mediated adverse reactions. Initiate systemic corticosteroids at a dose of 1 to 2 mg/kg/day prednisone or equivalent for severe immune-mediated adverse reactions. Administer corticosteroid eye drops to patients who develop uveitis, iritis, or episcleritis. Permanently discontinue YERVOY for immune-mediated ocular disease that is unresponsive to local immunosuppressive therapy. |
| Anti-CD20 Antibodies<br>(rituximab)              | Conjunctivitis                                         | NA                                           | Screening: Recommend pre-treatment ophthalmic exam including slit lamp exam and dilated fundoscopic exam.                                                                                                                                                                                                                                                                                                                                                                                                                                                                                                                                                                                                                                                                                                                                                                                                                                                                              |

**Table 5: Adverse events and their causes**

| Adverse Event                               | Causes                                                                                              | Management Recommendations for the Medical Oncologist (From DSG)                                                                                                                                                                                                                                                                                                |
|---------------------------------------------|-----------------------------------------------------------------------------------------------------|-----------------------------------------------------------------------------------------------------------------------------------------------------------------------------------------------------------------------------------------------------------------------------------------------------------------------------------------------------------------|
| Amaurosis                                   | Vemurafenib                                                                                         | Immediate assessment by ophthalmology. Withhold drug until seen by an ophthalmologist.                                                                                                                                                                                                                                                                          |
| Blepharitis                                 | Gefitinib, Erlotinib, Afatinib                                                                      | Prior to therapy refer for baseline assessment to ophthalmologist if patient known to have blepharitis. If there is baseline blepharitis that is mild to moderate supportive care with lid scrubs should be initiated. If blepharitis progresses consider adding a topical ophthalmic antibiotic ointment to the lid margin such as erythromycin or bacitracin. |
| Cataract                                    | Ibrutinib, Ipilimumab                                                                               | Continue management. Refer to ophthalmology regarding assessment for cataract surgery.                                                                                                                                                                                                                                                                          |
| Central Serous Chorioretinopathy (Figure 4) | Trametinib                                                                                          | Discontinue drug until assessment by an ophthalmologist. Consider dose modification or cessation of drug depending on ophthalmologist recommendations.                                                                                                                                                                                                          |
| Conjunctivitis                              | Afatinib, Dasatinib, Erlotinib, Gefitinib, Imatinib, Vemurafenib, Cetuximab, Panitumumab, Rituximab | Continue management. Consider subacute assessment within 1 month by ophthalmologist.                                                                                                                                                                                                                                                                            |
| Corneal Erosion or Abrasion                 | Erlotinib, Gefitinib                                                                                | Immediate assessment by ophthalmology. Withhold drug until seen by an ophthalmologist.                                                                                                                                                                                                                                                                          |
| Corneal Membrane Sloughing                  | Gefitinib                                                                                           | Immediate assessment by ophthalmology. Withhold drug until seen by an ophthalmologist.                                                                                                                                                                                                                                                                          |
| Corneal Opacities                           | Vandetanib                                                                                          | Refer at baseline prior to initiation of medication to assess for any underlying corneal pathology. Stop medication and refer to ophthalmologist immediately if patient develops any ocular symptoms. Topical steroids may be necessary but should only be administered by an ophthalmologist                                                                   |
| Corneal Perforation                         | Erlotinib                                                                                           | Immediate referral to Ophthalmology. Consider withholding drug or modifying drug dosage until assessment by an ophthalmologist                                                                                                                                                                                                                                  |
| Corneal Ulceration                          | Erlotinib, Gefitinib                                                                                | Immediate assessment by ophthalmology. Withhold drug until seen by an ophthalmologist                                                                                                                                                                                                                                                                           |
| Cystoid Macular Edema                       | Vemurafenib, Dabrafenib                                                                             | Immediate referral to ophthalmologist (1-3 days). If confirmed stop drug and see if edema resolves. If edema resolves can consider resuming drug at lower dose or change drug. If edema does not resolve refer to retina specialists consider local intravitreal therapy                                                                                        |
| Dry Eyes                                    | Gefitinib, Trametinib                                                                               | Initiate artificial tears. Consult ophthalmology and consider continuing drug or modifying the dose upon consultation                                                                                                                                                                                                                                           |
| Episcleritis                                | Ipilimumab                                                                                          | Subacute assessment within 1 month by ophthalmology. Consider withholding drug until ophthalmology consult.                                                                                                                                                                                                                                                     |
| Eye Pain                                    | Vemurafenib, Rituximab                                                                              | Subacute assessment within 1 month by ophthalmology. Consider withholding drug until ophthalmology consult.                                                                                                                                                                                                                                                     |

*(Continued)*

| Adverse Event                         | Causes                  | Management Recommendations for the Medical Oncologist (From DSG)                                                                                                                                                                       |
|---------------------------------------|-------------------------|----------------------------------------------------------------------------------------------------------------------------------------------------------------------------------------------------------------------------------------|
| Glaucoma                              | Rituximab               | Immediate assessment by an ophthalmologist is merited with signs and symptoms of acute angle closure glaucoma. Otherwise, consider subacute referral within 1 month to ophthalmology                                                   |
| Graves Like Ophthalmopathy            | Ipilimumab              | Ophthalmology assessment within 2-3 weeks. Consider dose alteration of withholding medications until assessment by an ophthalmologist                                                                                                  |
| Hyperlacrimation                      | Panitimumab             | Continue medical regimen. Routine ophthalmology referral.                                                                                                                                                                              |
| Iridocyclitis/Iritis                  | Vemurafenib, Ipilimumab | Ophthalmology assessment within 1-2 weeks. Consider withholding medication until ophthalmology assessment.                                                                                                                             |
| Keratitis                             | Keratitis               | If mild, initiate artificial tears, refer for ophthalmology assessment within 1-2 weeks and continue drug. If severe, immediate referral to ophthalmology is merited with considerations to withhold the medication until assessment.  |
| Keratoconjunctivitis Sicca            | Erlotinib               | If mild, refer for ophthalmology assessment within 1-2 weeks and continue drug. If severe, immediate referral to ophthalmology is merited with considerations to withhold the medication until assessment.                             |
| Macular Edema                         | Vemurafenib             | If severe, refer for immediate assessment by ophthalmology and consider withholding medication until assessment.                                                                                                                       |
| Ocular Hemorrhage                     | Gefitinib               | If severe, refer for immediate assessment by ophthalmology and consider withholding medication until assessment.                                                                                                                       |
| Ocular Ischemia                       | Gefitinib               | If severe, refer for immediate assessment by ophthalmology and consider withholding medication until assessment.                                                                                                                       |
| Periorbital Edema                     | Imatinib, Nilotinib,    | If mild, refer for ophthalmology assessment within 1-2 weeks and continue drug. If severe, immediate referral to ophthalmology is merited with considerations to withhold the medication until assessment.                             |
| Retinal Artery Occlusion              | Vemurafenib             | Withhold medication and refer for immediate assessment by an ophthalmologist if symptoms have occurred within a 24-hour timespan. If symptoms have persisted for greater than 24 hours, subacute referral to ophthalmology is merited. |
| Retinal Pigment Epithelium Detachment | Trametinib              | Refer for immediate assessment by an ophthalmologist. Consider dose modification or withholding the medications until ophthalmology assessment.                                                                                        |
| Retinal Venous Occlusion (Figure 1)   | Trametinib              | Withhold medication and refer for immediate assessment by an ophthalmologist if symptoms have occurred within a 24-hour timespan. If symptoms have persisted for greater than 24 hours, subacute referral to ophthalmology is merited  |

(Continued)

| Adverse Event                    | Causes                                                                                                          | Management Recommendations for the Medical Oncologist (From DSG)                                                                                                                                                                      |
|----------------------------------|-----------------------------------------------------------------------------------------------------------------|---------------------------------------------------------------------------------------------------------------------------------------------------------------------------------------------------------------------------------------|
| Subconjunctival Hemorrhage       | Imatinib, Nilotinib                                                                                             | Continue drug. Routine referral to ophthalmologist not acute. Supportive care as needed                                                                                                                                               |
| Superficial Punctate Keratopathy | Gefitinib                                                                                                       | If mild, initiate artificial tears, refer for ophthalmology assessment within 1-2 weeks and continue drug. If severe, immediate referral to ophthalmology is merited with considerations to withhold the medication until assessment. |
| Trichomegaly                     | Gefitinib, Erlotinib, Afatinib                                                                                  | Trim lashes as needed. Refer to ophthalmologist if symptoms affect vision or if direct lash/corneal touch develops                                                                                                                    |
| Uveitis                          | Ipilimumab, Vemurafenib, Dabrafenib                                                                             | If mild, consider initiating topical steroids, holding medication or dose modification, and subacute ophthalmology assessment within 1 month. If severe, hold medication and refer for immediate assessment by an ophthalmologist.    |
| Visual Disturbance               | Ceritinib, Crizotinib, Dasatinib, Gefitinib, Ibrutinib, Imatinib, Nilotinib, Trametinib, Vemurafenib, Rituximab | Management depends on severity. Consider ophthalmic consultation especially with drugs with known sight threatening events (e.g., trametinib, crizotinib, imatinib).                                                                  |

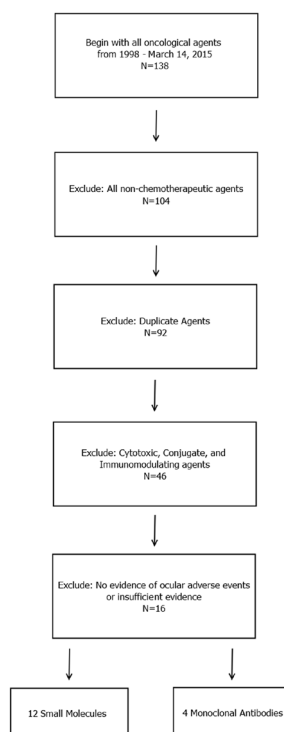

**Figure 1: Diagram for the inclusion of anticancer agents that were analyzed.** All FDA-approved cancer-related agents were screened between January 1, 1998, and March 14, 2015. All non-chemotherapeutic agents, duplicate agents, and cytotoxic agents were excluded. FDA labels were retrieved for the remaining agents, and all agents that displayed evidence of ocular adverse events were included in the study. A total of 16 agents (4 monoclonal antibodies and 12 small-molecule targeted inhibitors) were initially included in the study. Four agents (bortezomib, pertuzumab, dabrafenib, and idelalisib) were associated with minor ocular adverse events according to the FDA label, but no evidence of ocular toxicity was evident upon an independent survey of the literature; these agents were therefore excluded.

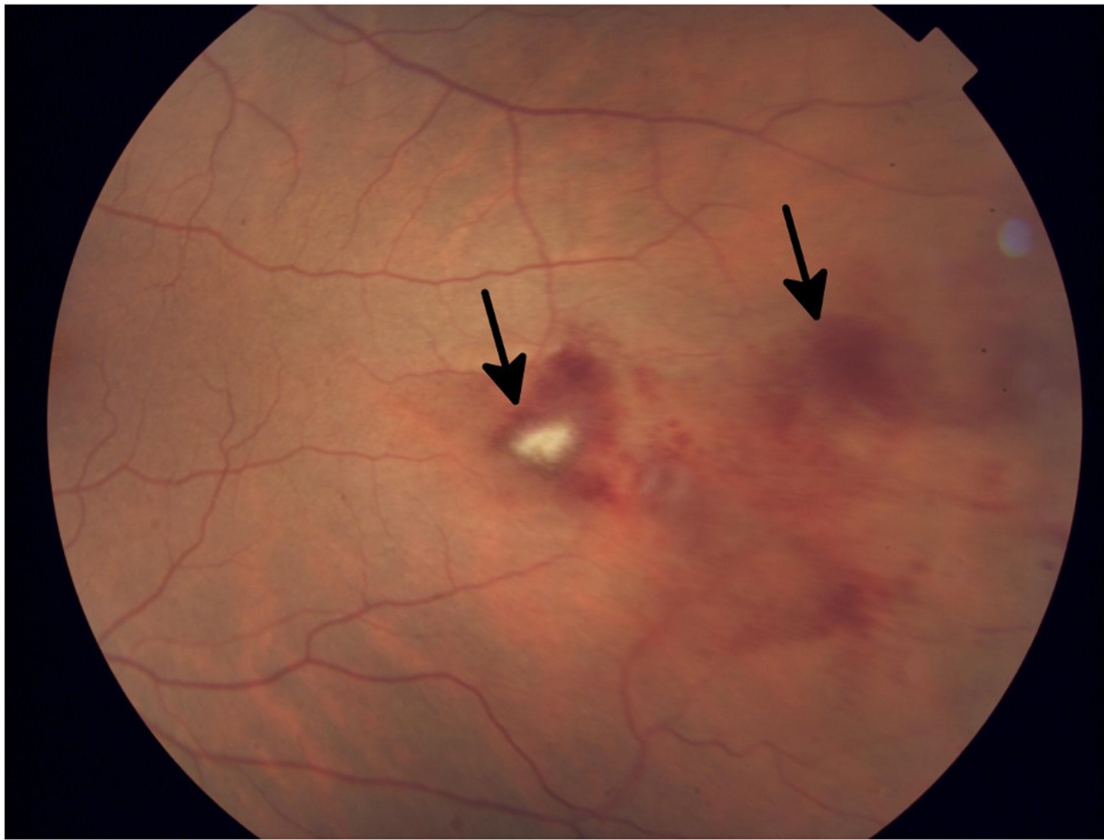

**Figure 2: Fundus photograph of the left eye in a patient who developed grade 1 branch vein occlusion while undergoing MEK inhibitor therapy. Arrows denote dot blot hemorrhages in the fundus, consistent with occlusion.**

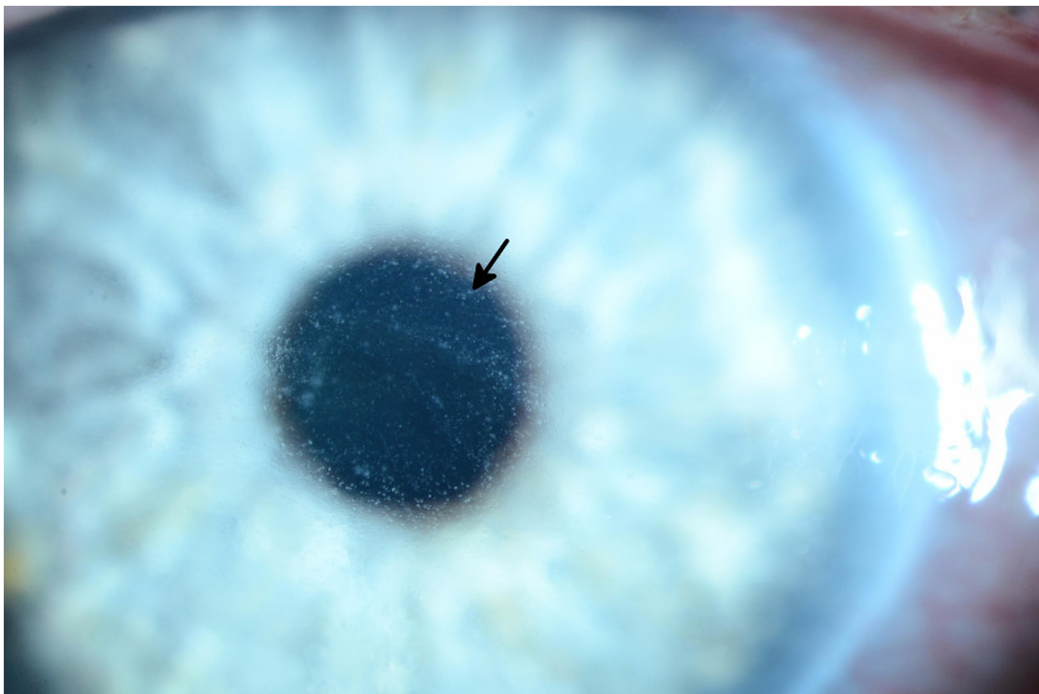

**Figure 3: Slit lamp photograph of grade 3 diffuse microcystic changes (arrow) in a patient undergoing treatment with an EGFR inhibitor. The patient subsequently developed ocular hypertension due to the topical steroid used to treat the microcysts.**



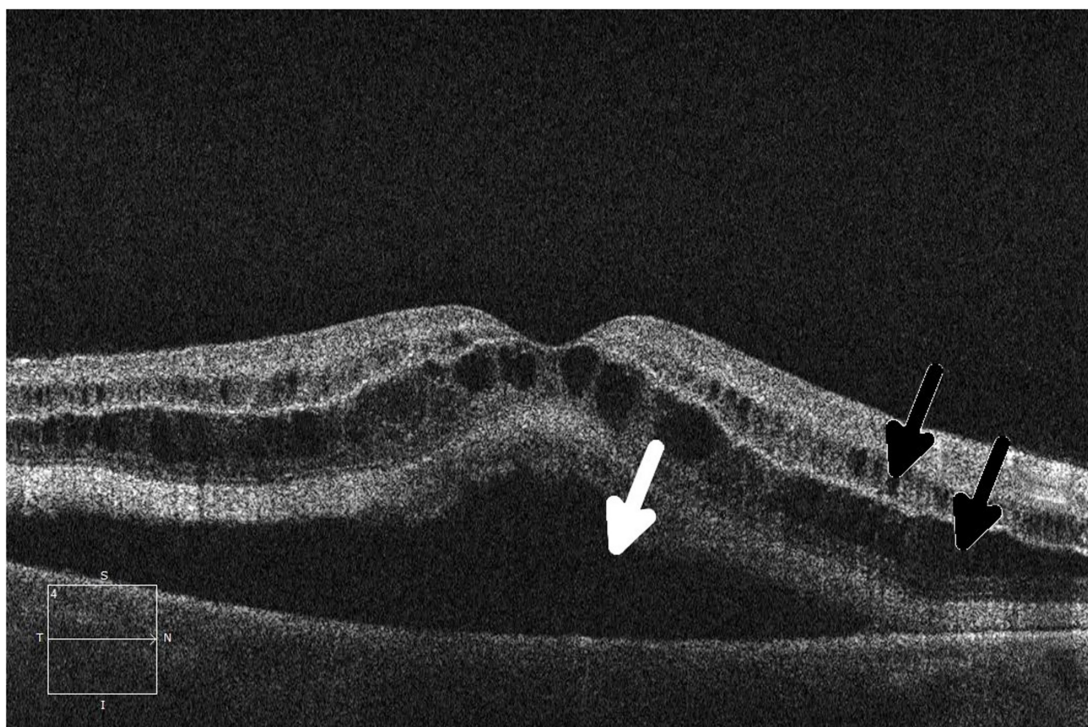

**Figure 4:** Ocular coherence tomography (OCT) shows intraretinal (black arrows) and subretinal (white arrow) fluid in a patient being treated with a MEK inhibitor who subsequently developed grade 2 retinopathy with retinal and subretinal cysts.

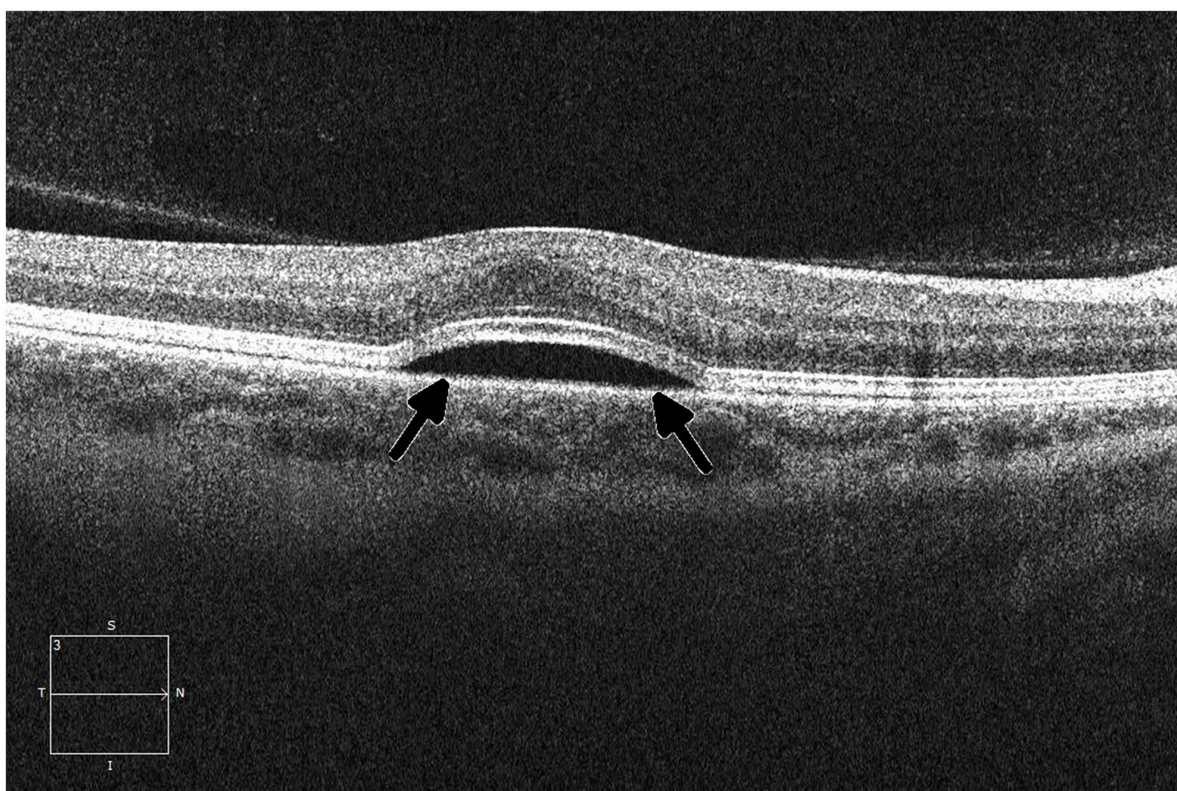

**Figure 5:** Ocular coherence tomography (OCT) displays a perpendicular cut through the retina in a patient with metastatic melanoma undergoing therapy with a small-molecule ERK inhibitor, demonstrating central serous retinopathy with subretinal fluid buildup (arrows).

event with “life-threatening consequences,” which is atypical of nearly all ocular adverse events. These limitations will be addressed in the upcoming version of the CTCAE.

Studies referenced by FDA labels provide one perspective of toxicity incidence in the general population; however, all labels acknowledge that because clinical trials are conducted under widely varying conditions, adverse reaction rates observed in the clinical trials of a drug cannot be directly compared with rates in clinical trials of another drug and may not reflect the rates observed in practice. Preliminary data are already beginning to show rates of ocular toxicity that are higher than those reported in the labels. One such example of this is with the incidence of toxicity seen in MEK inhibitors. Preliminary data show that the incidence of retinal pigment epithelial detachment with or without central serous retinopathy (Figure 4) occurred in 30 of 94 patients (31.9%) across six phase 1 clinical trials. This is a substantial increase from the reported figure (0.8%).

As evidenced by our data, ocular adverse events are an increasingly common concern in treatment with targeted anticancer agents. We hope that this study will set the stage for further specific recommendations for the screening and management of ocular toxicities in this entire class of medications. With the increased incidence of ocular toxicities, assessment by and involvement of an ophthalmologist in the treatment of patients receiving agents known to cause ocular events is merited. As the landscape of oncologic management and adverse events changes with advancing therapy, a more multidisciplinary approach to the treatment of patients with cancer is a reasonable recommendation.

## **MATERIALS AND METHODS**

### **Drug retrieval**

The CenterWatch database of U.S. Food and Drug Administration (FDA)-approved oncologic agents was reviewed by two independent authors (C. F. and J. L.) for potential candidate agents. 138 agents that were FDA-approved between January 1, 1998, and March 14, 2015, were reviewed and screened for inclusion. We excluded all non-chemotherapeutic and duplicate agents; cytotoxic, conjugate, and immunomodulating agents; and agents with no (or insufficient) evidence of ocular adverse events (Figure 5). A review of the FDA labels for the remaining agents was performed to exclude agents for which no ocular adverse events had been reported. In addition, a simultaneous review of the literature was performed to identify any independent studies that observed these adverse events as well as any ocular adverse events observed after FDA approval of the agent. We searched Medline and Google Scholar for evidence of ocular adverse events in the remaining

targeted agents. Search limits included all studies from drug inception to the present day. FDA labels for 46 targeted oncologic agents were retrieved and screened for ocular toxicity.

### **Identification of ocular adverse events and study selection**

Eligible studies for review included phase 1 or higher clinical trials that investigated targeted therapies as monotherapy, as well as a number of meta-analyses and pertinent reviews of the literature. Search terms included the drug name with Boolean operators AND phase NOT combination, and NOT plus. Studies were screened on the basis of relevance, patient demographics, study design, route of drug administration, and procedural integrity (i.e., randomized, double-blinded controlled trials). All studies that were included were monotherapy trials of the targeted agent. Studies that did not report ocular adverse events were excluded and were not retrieved. In addition, we excluded studies that had used small-molecule drugs in conjunction with cytotoxic therapy, those that were not monotherapy, and those that failed to include adverse events below grade 3. Clinical studies were retrieved from Medline, Google Scholar, the Cochrane database, and the NIH Clinical Trials Database. Studies searched on the NIH database were limited to those with results and were reviewed for inclusion criteria and possible retrieval based on study details provided by the sponsor institution.

All ocular adverse event frequencies and severities were identified on the basis of data from both FDA labels and independent clinical studies. When available, FDA label-referenced studies were retrieved and used to create an overview of ocular toxicities across all FDA label-referenced studies. If discrete FDA data were unavailable, data from independent studies were screened for inclusion criteria and reported.

### **Study retrieval and data pooling**

Two authors independently reviewed the abstracts and figures of all eligible studies. All relevant mention of ocular adverse events were noted and retrieved. Of these studies, the authors reviewed the data and methods for sufficient rigor and independently assessed for risk of bias. All studies that failed to report nominal data, failed to partition the data into discrete adverse events, or failed to report total adverse events were excluded.

Studies were reviewed according to selection criteria. Of these, only studies that reported ocular adverse events were included. Meta-analyses and review articles were reviewed and retrieved as indicated. Data on ocular adverse events, including frequency of independent events, were gathered and reported from FDA labels and selected studies. If the cohort demographics and study



designs were similar, the results were pooled. From these data of ocular adverse events, severity of toxicities were separated on the basis of Common Terminology Criteria for Adverse Events v4.03 (CTCAE) grade [22].

## Drug comparison

Drugs were separated into two classes: small-molecule targeted inhibitors and monoclonal antibodies. Data from the two groups of targeted therapies were analyzed to determine significant differences between them. Specific parameters examined included overall frequency of ocular adverse events, frequency of events graded at least CTCAE grade 3, the most frequent ocular adverse events in each class, and the percentage of drugs that were associated with ocular adverse events in each class. Significant findings were then re-examined between with agents that were matched by mechanism of action. Percentages of drugs per class causing ocular events were calculated as total number of agents with known ocular adverse events divided by total number of agents in the group.

## Formulation of clinical recommendations

Known ocular adverse events were screened for most pertinent events. Ocular adverse events were included on the basis of the following characteristics: Incidence and frequency of the event, acuteness and aggressiveness of onset, severity of the event, and irreversibility of the event. Next, existing guidelines were retrieved for drugs that have well-documented ocular adverse events (e.g., hydroxychloroquine, ethambutol). A review of the literature was performed to identify relevant meta-analyses, randomized controlled trials, reviews, case-control or cohort studies, and case reports or case-series. Interventions and recommendations for rare or unique cases were identified in case studies. Recommendations were formulated with the input of an expert consultant with extensive expertise in dealing with ocular toxicities (DSG).

## ACKNOWLEDGMENTS

At the invitation of Dr. Sean Khozin MD, MPH, Office of Hematology Oncology Products, an earlier version of this manuscript was presented at the FDA symposium, "Ocular Toxicity Mini-Symposium," FDA Campus, Bethesda, MD, September 4, 2015. The authors would like to acknowledge Dr. Khozin and the rest of the symposium for their valuable feedback. In addition, the authors would like to acknowledge Ms. Tamara K. Locke for edits and proofing of the manuscript.

## CONFLICTS OF INTEREST

Dr. David S. Hong is a PI on trials with Amgen, Astra-Zeneca, BMS, Daiichi-Sankyo, Eisai, Lilly, Mirati,

MiRNA, Merck, Xbiotech, Pfizer, Sanofi, Pharmacyclics, Kwowaya Pharm, and Bayer and has consulted for Amgen, Bayer, Eisai, H3, and Janssen. The rest of the authors have no conflicts of interest to disclose.

## REFERENCES

- Centerwatch Database of FDA Approved Drugs. <http://www.centerwatch.com>.
- Agustoni F, Platania M, Vitali M, Zilembo N, Haspinger E, Sinno V, Gallucci R, de Braud F, Garassino MC. Emerging toxicities in the treatment of non-small cell lung cancer: ocular disorders. *Cancer Treat Rev*. 2014; 40: 197-203.
- al-Tweigeri T, Nabholz JM, Mackey JR. Ocular toxicity and cancer chemotherapy. A review. *Cancer*. 1996; 78: 1359-73.
- Renouf DJ, Velazquez-Martin JP, Simpson R, Siu LL, Bedard PL. Ocular toxicity of targeted therapies. *J Clin Oncol*. 2012; 30: 3277-86.
- Gerber DE. Targeted therapies: a new generation of cancer treatments. *Am Fam Physician*. 2008; 77: 311-9.
- Huillard O, Bakalian S, Levy C, Desjardins L, Lumbroso-Le Rouic L, Pop S, Sablin MP, Le Tourneau C. Ocular adverse events of molecularly targeted agents approved in solid tumours: a systematic review. *Eur J Cancer*. 2014; 50: 638-48.
- Schmucker C, Ehlken C, Agostini HT, Antes G, Ruecker G, Lelgemann M, Loke YK. A safety review and meta-analyses of bevacizumab and ranibizumab: off-label versus goldstandard. *PLoS One*. 2012; 7: e42701.
- Ciardiello F, Tortora G. EGFR antagonists in cancer treatment. *N Engl J Med*. 2008; 358: 1160-74.
- Basti S. Ocular toxicities of epidermal growth factor receptor inhibitors and their management. *Cancer Nurs*. 2007; 30: S10-6.
- Liu Z, Xie Y. Epidermal growth factor and its receptors family on the ocular surface. *Yan Ke Xue Bao*. 1999; 15: 146-52.
- Liu Y, Liu ZG. [Role of epidermal growth factor and its receptor family in ocular surface wound healing]. [Article in Chinese]. *Zhonghua Yan Ke Za Zhi*. 2007; 43: 953-6.
- Montagut C, Settleman J. Targeting the RAF-MEK-ERK pathway in cancer therapy. *Cancer Lett*. 2009; 283: 125-34.
- Roberts PJ, Der CJ. Targeting the Raf-MEK-ERK mitogen-activated protein kinase cascade for the treatment of cancer. *Oncogene*. 2007; 26: 3291-310.
- Fraunfelder FW, Yang HK. Association between bortezomib therapy and eyelid chalazia. *JAMA Ophthalmol*. 2016; 134: 88-90.
- Yun C, Mukhi N, Kremer V, Shinder R, Verma V, Olcay B. Chalazia development in multiple myeloma: a new complication associated with bortezomib therapy. *Hematol Rep*. 2015; 7: 5729.

16. Grob SR, Jakobiec FA, Rashid A, Yoon MK. Chalazia associated with bortezomib therapy for multiple myeloma. *Ophthalmology*. 2014; 121: 1845-7.e3.
17. Draganova D, Kerger J, Caspers L, Willermain F. Severe bilateral panuveitis during melanoma treatment by Dabrafenib and Trametinib. *J Ophthalmic Inflamm Infect*. 2015; 5: 17.
18. Kwon ED, Drake CG, Scher HI, Fizazi K, Bossi A, van den Eertwegh AJ, Krainer M, Houede N, Santos R, Mahammedi H, Ng S, Maio M, Franke FA, et al. Ipilimumab versus placebo after radiotherapy in patients with metastatic castration-resistant prostate cancer that had progressed after docetaxel chemotherapy (CA184-043): a multicentre, randomised, double-blind, phase 3 trial. *Lancet Oncol*. 2014; 15: 700-12.
19. Marmor MF, Kellner U, Lai TY, Lyons JS, Mieler WF. Revised recommendations on screening for chloroquine and hydroxychloroquine retinopathy. *Ophthalmology*. 2011; 118: 415-22.
20. Chan RY, Kwok AK. Ocular toxicity of ethambutol. *Hong Kong Med J*. 2006; 12: 56-60.
21. van der Noll R, Leijen S, Neuteboom GH, Beijnen JH, Schellens JH. Effect of inhibition of the FGFR-MAPK signaling pathway on the development of ocular toxicities. *Cancer Treat Rev*. 2013; 39: 664-72.
22. National Cancer Institute (U.S.). Common terminology criteria for adverse events (CTCAE). Bethesda, MD: U.S. Department of Health and Human Services, National Institutes of Health, National Cancer Institute. 2009.
23. Chun SG, Iyengar P, Gerber DE, Hogan RN, Timmerman RD. Optic neuropathy and blindness associated with crizotinib for non-small-cell lung cancer with EML4-ALK translocation. *J Clin Oncol*. 2015; 33: e25-6.
24. Lacouture ME. Mechanisms of cutaneous toxicities to EGFR inhibitors. *Nat Rev Cancer*. 2006; 6: 803-12.
25. Groothuis DR. The blood-brain and blood-tumor barriers: a review of strategies for increasing drug delivery. *Neuro Oncol*. 2000; 2: 45-59.
26. Lampson LA. Monoclonal antibodies in neuro-oncology: getting past the blood-brain barrier. *MAbs*. 2011; 3: 153-60.
27. Margolin K. Ipilimumab in a Phase II trial of melanoma patients with brain metastases. *Oncoimmunology*. 2012; 1: 1197-9.
28. Prins RM, Vo DD, Khan-Farooqi H, Yang MY, Soto H, Economou JS, Liao LM, Ribas A. NK and CD4 cells collaborate to protect against melanoma tumor formation in the brain. *J Immunol*. 2006; 177: 8448-55.
29. Wilson EH, Weninger W, Hunter CA. Trafficking of immune cells in the central nervous system. *J Clin Invest*. 2010; 120: 1368-79.
30. Gilotrif (Afinib) FDA Package Insert. Rheim, Germany: Boehringer Ingelheim Pharmaceuticals, Inc. 2013.
31. Bortezomib (Velcade) FDA Package Insert. Cambridge, MA: Millennium Pharmaceutical. 2014.
32. Zykadia (Ceritinib) FDA Package Insert. Basel, Switzerland: Novartis. 2015.
33. Xalkori (Crizotinib) FDA Package Insert. New York City, NY: Pfizer. 2014.
34. Dabrafenib (Tafinlar) FDA Package Insert. Brentford, UK: GlaxoSmithKline. 2014.
35. Sprycel (Dasatinib) FDA Package Insert. New York City, NY: Bristol-Myers Squibb. 2015.
36. Tarceva (Erlotinib) FDA Package Insert. Farnham, UK: OSI Pharmaceuticals Inc. 2013.
37. Iressa (Gefitinib) FDA Package Insert. London, UK: AstraZeneca. 2015.
38. Gleevec (Imatinib) FDA Package Insert. Basel, Switzerland: Novartis. 2015.
39. Tasigna (Nilotinib) FDA Package Insert. Basel, Switzerland: Novartis. 2010.
40. Mekinist (Trametinib) FDA Label Insert. London, UK: GlaxoSmithKline. 2014.
41. Caprelsa (Vandetanib) FDA Package Insert. London, UK: AstraZeneca. 2014.
42. Zelboraf (Vemurafenib) FDA Package Insert. San Francisco, CA: Genentech. 2014.
43. Erbitux (Cetuximab) FDA Package Insert. New York City, NY: Bristol-Myers Squibb. 2013.
44. Yervoy (Ipilimumab) FDA Package Insert. New York City, NY: Bristol-Myers Squibb. 2015.
45. Vectibix (Panitumumab) FDA Package Insert. Thousand Oaks, CA: Amgen. 2014.
46. Perjeta (Pertuzumab) FDA Package Insert. San Francisco, CA: Genentech. 2013.
47. Rituxan (Rituximab) FDA Package Insert. San Francisco, CA: Genentech. 2014.
48. Genova C, Rijavec E, Barletta G, Burrafato G, Biello F, Dal Bello MG, Coco S, Truini A, Alama A, Boccardo F, Grossi F. Afatinib for the treatment of advanced non-small-cell lung cancer. *Expert Opin Pharmacother*. 2014; 15: 889-903.
49. Katakami N, Atagi S, Goto K, Hida T, Horai T, Inoue A, Ichinose Y, Kobayashi K, Takeda K, Kiura K, Nishio K, Seki Y, Ebisawa R, et al. LUX-Lung 4: a phase II trial of afatinib in patients with advanced non-small-cell lung cancer who progressed during prior treatment with erlotinib, gefitinib, or both. *J Clin Oncol*. 2013; 31: 3335-41.
50. Seiwert TY, Fayette J, Cupissol D, Del Campo JM, Clement PM, Hitt R, Degardin M, Zhang W, Blackman A, Ehrnrooth E, Cohen EE. A randomized, phase II study of afatinib versus cetuximab in metastatic or recurrent squamous cell carcinoma of the head and neck. *Ann Oncol*. 2014; 25: 1813-20.
51. Shaw AT, Kim DW, Mehra R, Tan DS, Felip E, Chow LQ, Camidge DR, Vansteenkiste J, Sharma S, De Pas T, Riely GJ, Solomon BJ, Wolf J, et al. Ceritinib in ALK-rearranged non-small-cell lung cancer. *N Engl J Med*. 2014; 370: 1189-97.

52. Richly H, Kim TM, Schuler M, Kim DW, Harrison SJ, Shaw AT, Boral AL, Yovine A, Solomon B. Ceritinib in patients with advanced anaplastic lymphoma kinase-rearranged anaplastic large-cell lymphoma. *Blood*. 2015; 126: 1257-8.
53. Cooper MR, Chim H, Chan H, Durand C. Ceritinib: a new tyrosine kinase inhibitor for non-small-cell lung cancer. *Ann Pharmacother*. 2015; 49: 107-12.
54. Camidge DR, Bang YJ, Kwak EL, Iafrate AJ, Varella-Garcia M, Fox SB, Riely GJ, Solomon B, Ou SH, Kim DW, Salgia R, Fidias P, Engelman JA, et al. Activity and safety of crizotinib in patients with ALK-positive non-small-cell lung cancer: updated results from a phase 1 study. *Lancet Oncol*. 2012; 13: 1011-9.
55. Shaw AT, Kim DW, Nakagawa K, Seto T, Crino L, Ahn MJ, De Pas T, Besse B, Solomon BJ, Blackhall F, Wu YL, Thomas M, O'Byrne KJ, et al. Crizotinib versus chemotherapy in advanced ALK-positive lung cancer. *N Engl J Med*. 2013; 368: 2385-94.
56. Kantarjian H, Shah NP, Hochhaus A, Cortes J, Shah S, Ayala M, Moiraghi B, Shen Z, Mayer J, Pasquini R, Nakamae H, Huguet F, Boque C, et al. Dasatinib versus imatinib in newly diagnosed chronic-phase chronic myeloid leukemia. *N Engl J Med*. 2010; 362: 2260-70.
57. Talpaz M, Shah NP, Kantarjian H, Donato N, Nicoll J, Paquette R, Cortes J, O'Brien S, Nicaise C, Bleickardt E, Blackwood-Chirchir MA, Iyer V, Chen TT, et al. Dasatinib in imatinib-resistant Philadelphia chromosome-positive leukemias. *N Engl J Med*. 2006; 354: 2531-41.
58. Cappuzzo F, Ciuleanu T, Stelmakh L, Cienas S, Szczesna A, Juhasz E, Esteban E, Molinier O, Brugger W, Melezinek I, Klingelschmitt G, Klughammer B, Giaccone G. Erlotinib as maintenance treatment in advanced non-small-cell lung cancer: a multicentre, randomised, placebo-controlled phase 3 study. *Lancet Oncol*. 2010; 11: 521-9.
59. Lee SM, Khan I, Upadhyay S, Lewanski C, Falk S, Skailes G, Marshall E, Woll PJ, Hatton M, Lal R, Jones R, Toy E, Chao D, et al. First-line erlotinib in patients with advanced non-small-cell lung cancer unsuitable for chemotherapy (TOPICAL): a double-blind, placebo-controlled, phase 3 trial. *Lancet Oncol*. 2012; 13: 1161-70.
60. Perez-Soler R, Chachoua A, Hammond LA, Rowinsky EK, Huberman M, Karp D, Rigas J, Clark GM, Santabarbara P, Bonomi P. Determinants of tumor response and survival with erlotinib in patients with non-small-cell lung cancer. *J Clin Oncol*. 2004; 22: 3238-47.
61. Rosell R, Carcereny E, Gervais R, Vergnenegre A, Massuti B, Felip E, Palmero R, Garcia-Gomez R, Pallares C, Sanchez JM, Porta R, Cobo M, Garrido P, et al. Erlotinib versus standard chemotherapy as first-line treatment for European patients with advanced EGFR mutation-positive non-small-cell lung cancer (EURTAC): a multicentre, open-label, randomised phase 3 trial. *Lancet Oncol*. 2012; 13: 239-46.
62. Shepherd FA, Rodrigues Pereira J, Ciuleanu T, Tan EH, Hirsh V, Thongprasert S, Campos D, Maoleekoonpiroj S, Smylie M, Martins R, van Kooten M, Dediu M, Findlay B, et al. Erlotinib in previously treated non-small-cell lung cancer. *N Engl J Med*. 2005; 353: 123-32.
63. Kim ES, Hirsh V, Mok T, Socinski MA, Gervais R, Wu YL, Li LY, Watkins CL, Sellers MV, Lowe ES, Sun Y, Liao ML, Osterlind K, et al. Gefitinib versus docetaxel in previously treated non-small-cell lung cancer (INTEREST): a randomised phase III trial. *Lancet*. 2008; 372: 1809-18.
64. Mok TS, Wu YL, Thongprasert S, Yang CH, Chu DT, Saijo N, Sunpaweravong P, Han B, Margono B, Ichinose Y, Nishiwaki Y, Ohe Y, Yang JJ, et al. Gefitinib or carboplatin-paclitaxel in pulmonary adenocarcinoma. *N Engl J Med*. 2009; 361: 947-57.
65. Thatcher N, Chang A, Parikh P, Rodrigues Pereira J, Ciuleanu T, von Pawel J, Thongprasert S, Tan EH, Pemberton K, Archer V, Carroll K. Gefitinib plus best supportive care in previously treated patients with refractory advanced non-small-cell lung cancer: results from a randomised, placebo-controlled, multicentre study (Iressa Survival Evaluation in Lung Cancer). *Lancet*. 2005; 366: 1527-37.
66. Tullo AB, Esmali B, Murray PI, Bristow E, Forsythe BJ, Faulkner K. Ocular findings in patients with solid tumours treated with the epidermal growth factor receptor tyrosine kinase inhibitor gefitinib ('Iressa', ZD1839) in Phase I and II clinical trials. *Eye (Lond)*. 2005; 19: 729-38.
67. Byrd JC, Brown JR, O'Brien S, Barrientos JC, Kay NE, Reddy NM, Coutre S, Tam CS, Mulligan SP, Jaeger U, Devereux S, Barr PM, Furman RR, et al. Ibrutinib versus ofatumumab in previously treated chronic lymphoid leukemia. *N Engl J Med*. 2014; 371: 213-23.
68. Blanke CD, Rankin C, Demetri GD, Ryan CW, von Mehren M, Benjamin RS, Raymond AK, Bramwell VH, Baker LH, Maki RG, Tanaka M, Hecht JR, Heinrich MC, et al. Phase III randomized, intergroup trial assessing imatinib mesylate at two dose levels in patients with unresectable or metastatic gastrointestinal stromal tumors expressing the kit receptor tyrosine kinase: S0033. *J Clin Oncol*. 2008; 26: 626-32.
69. Corless CL, Ballman KV, Antonescu C, Blanke CD, Blackstein ME, Demetri GD, von Mehren M, Maki RG, Pisters PW, DeMatteo RP. Relation of tumor pathologic and molecular features to outcome after surgical resection of localized primary gastrointestinal stromal tumor (GIST): results of the intergroup phase III trial ACOSOG Z9001. 2010 ASCO Annual Meeting. 2010.
70. Fraunfelder FW, Solomon J, Druker BJ, Esmali B, Kuyl J. Ocular side-effects associated with imatinib mesylate (Gleevec). *J Ocul Pharmacol Ther*. 2003; 19: 371-5.
71. Saglio G, Kim DW, Issaragrisil S, le Coutre P, Etienne G, Lobo C, Pasquini R, Clark RE, Hochhaus A, Hughes TP, Gallagher N, Hoenekopp A, Dong M, et al. Nilotinib versus imatinib for newly diagnosed chronic myeloid leukemia. *N Engl J Med*. 2010; 362: 2251-9.
72. Falchook GS, Lewis KD, Infante JR, Gordon MS, Vogelzang NJ, DeMarini DJ, Sun P, Moy C, Szabo SA,



- Roadcap LT, Peddareddigari VG, Lebowitz PF, Le NT, et al. Activity of the oral MEK inhibitor trametinib in patients with advanced melanoma: a phase 1 dose-escalation trial. *Lancet Oncol.* 2012; 13: 782-9.
73. Flaherty KT, Robert C, Hersey P, Nathan P, Garbe C, Milhem M, Demidov LV, Hassel JC, Rutkowski P, Mohr P, Dummer R, Trefzer U, Larkin JM, et al. Improved survival with MEK inhibition in BRAF-mutated melanoma. *N Engl J Med.* 2012; 367: 107-14.
  74. Infante JR, Fecher LA, Falchook GS, Nallapareddy S, Gordon MS, Becerra C, DeMarini DJ, Cox DS, Xu Y, Morris SR, Peddareddigari VG, Le NT, Hart L, et al. Safety, pharmacokinetic, pharmacodynamic, and efficacy data for the oral MEK inhibitor trametinib: a phase 1 dose-escalation trial. *Lancet Oncol.* 2012; 13: 773-81.
  75. Michalarea V, de Miguel Luken MJ, Diamantis N, Garg A, Maubon L, Yap TA, Molife LR, De Bono JS, Ursell P, Banerji U. Ocular toxicity with MEK inhibitors in phase I trials: a single centre experience across six clinical trials. 2015 ASCO Annual Meeting. 2015.
  76. Thornton K, Kim G, Maher VE, Chattopadhyay S, Tang S, Moon YJ, Song P, Marathe A, Balakrishnan S, Zhu H, Garnett C, Liu Q, Booth B, et al. Vandetanib for the treatment of symptomatic or progressive medullary thyroid cancer in patients with unresectable locally advanced or metastatic disease: U.S. Food and Drug Administration drug approval summary. *Clin Cancer Res.* 2012; 18: 3722-30.
  77. Larkin J, Del Vecchio M, Ascierto PA, Krajsova I, Schachter J, Neyns B, Espinosa E, Garbe C, Sileni VC, Gogas H, Miller WH Jr, Mandala M, Hossers GA, et al. Vemurafenib in patients with BRAF(V600) mutated metastatic melanoma: an open-label, multicentre, safety study. *Lancet Oncol.* 2014; 15: 436-44.
  78. McArthur GA, Chapman PB, Robert C, Larkin J, Haanen JB, Dummer R, Ribas A, Hogg D, Hamid O, Ascierto PA, Garbe C, Testori A, Maio M, et al. Safety and efficacy of vemurafenib in BRAF(V600E) and BRAF(V600K) mutation-positive melanoma (BRIM-3): extended follow-up of a phase 3, randomised, open-label study. *Lancet Oncol.* 2014; 15: 323-32.
  79. Hecht JR, Patnaik A, Berlin J, Venook A, Malik I, Tchekmedyian S, Navale L, Amado RG, Meropol NJ. Panitumumab monotherapy in patients with previously treated metastatic colorectal cancer. *Cancer.* 2007; 110: 980-8.
  80. Rubenstein JL, Fridlyand J, Abrey L, Shen A, Karch J, Wang E, Issa S, Damon L, Prados M, McDermott M, O'Brien J, Haqq C, Shuman M. Phase I study of intraventricular administration of rituximab in patients with recurrent CNS and intraocular lymphoma. *J Clin Oncol.* 2007; 25: 1350-6.
  81. Imbruvica (Ibrutinib) FDA Package Insert. Sunnyvale, CA: Pharmacyclics. 2015.
